# Supplementary material for: Seasonally different carbon flux changes in the Southern Ocean in response to the southern annular mode
Source: PubMed Central journal article supplement — Global Biogeochem Cycles. 2013 Dec 5;27(4):1236–45. doi: 10.1002/2013GB004600 (PMC4461076; doi:10.1002/2013gb004600), 2013-12-05
Supplement: gbc0027-1236-sd1.pdf [file gbc0027-1236-sd1.pdf]

## Auxiliary material for

### Seasonally different carbon flux changes in the Southern Ocean in response to the Southern Annular Mode

Judith Hauck, Christoph Völker, Tingting Wang, Mario Hoppema, Martin Losch, Dieter A. Wolf-Gladrow

(Alfred Wegener Institute, Helmholtz Centre for Polar and Marine Research, Bremerhaven, Germany)

## Global Biogeochemical Cycles

### Introduction

There are two appendices to the manuscript:

- 1) The detailed description of the ecosystem model: Regulated Ecosystem Model with 2 phytoplankton classes (REcoM-2) including model equations and parameter values.
- 2) More information on the model set-up and evaluation, including:
  - Model
    - Initialisation
    - Simulations
  - Mean model state
    - Southern Ocean circulation and nutrient fields
    - Phytoplankton growth limitation and distribution
    - Carbonate system
      - Contemporary carbonate system
      - Natural CO<sub>2</sub> fluxes
  - Seasonal cycle
    - Sea ice
    - Chlorophyll
  - SAM
